# Supplementary material
Source: publisher figshare collection journal article supplement (https://gsajournals.figshare.com/ndownloader/files/29041446)
Supplement: Supplementary file 1 [file 29041446]

## Sheet: qHD6-2
qHD6-2
Marker	Genomic position (bp)	Distance to causal gene (bp)a	MH63 allele	ZS97 alele	5' primer sequence	3' primer sequence
M8958906	8958906	104221	T	C	CTTATCCAGAAGAGACCGAGTT	CGCCGAATTGTATTGAACGTAG
M8967547	8967547	95580	G	A	CATCAACGTCAACCTCAATCCT	GCAGTGTGCTAGTGCTATATGG
M8982794	8982794	80333	T	C	ACCTACCTCTAGCACTTCAACA	TGTGGCAGGCATCTGATGA
M9045994	9045994	17133	C	T	GAGGTGGTGTCACTTAGGTCTA	TAGCGTGCAAGCCGTGTT
M9065137	9065137	0	C	CAAGA	CAATCAATCTCTTCTCAGGTC	GCCTATAAGATAGCGTCTCA
M9077067	9077067	11382	C	G	CGGTGACGAAGACGAGGAA	CGGTGCTAATAAGGTCCCAAG
M9080617	9080617	14932	A	C	GGCTTGTTGACAGAGCAGTTA	GATTAGGCATACAGGCTTTCCA
M9102357	9102357	36672	C	T	TGTTAATGTTCACCCTGTACTG	GCTGAAAGTGGTTACCTGGAT
M9132404	9132404	66719	G	A	ACCAGAAGACAAACAAGATGGG	AAGGAAGCTGGGAGGAACAC
M9197474	9197474	131789	C	T	CAGCCCAAACCCTAACCCTAA	CCATCCCGCTTTAATCCCTCT
M9235348	9235348	169663	G	A	CCTCCATCTCCTACTACTCCTT	CTAAGTTATACCATCCGCCTGA
aCausal gene (Hd1) locat at 9063127-9065685 bp.

## Sheet: qGL3-1
qGL3-1
Marker	Genomic position (bp)	Distance to causal gene (bp)a	MH63 allele	ZS97 alele	5' primer sequence	3' primer sequence
M17444900	17444900	155088	C	A	ACACTATTCCTCTGGCTCTGAC	CAATCTAGGCTGTTTCGCTCAA
M17480623	17480623	119365	C	A	TGAGAGGTTGAAGTTGACAGAA	GTGCGGCTAAGGTCATACAT
M17488249	17488249	111739	A	G	TGGATACTCAAGGCGTAAGCAT	GCAGCAGCATGATTACCACAA
M17546950	17546950	53038	A	G	ACGGATGAATCGGCAGAGG	ACAACCACCAGGAACCAACT
M17560830	17560830	39158	C	T	ACTACTGTCAAAGGAGCCATCT	TGAGTATGACCGTGCCATGT
M17570652	17570652	29336	C	G	TTCTGAAACCACTGAACCATCC	TGGCACACTATCTCGCATTATG
M17592346	17592346	7642	G	A	CGCCTTAGTTGATCTTGGTGTA	GAACGATTCTCCGACGACAA
M17599979	17599979	9	A	G	CTCGCATGAGAGCCAATACTC	CTCTGCTTGCGGTTATCTGTAA
M17605373	17605373	0	C	A	TGGATCATCAGTTCAACTTGCT	GCTTGCTATCTGTCGAATTGTT
M17620701	17620701	15103	C	T	TGCTGTAAGGTGACCTGACAA	GCAGGAGTACAAGGCGAAG
M17630222	17630222	24624	T	G	AGGATGACGGGAGATTCTTACA	GATGGACGCAGCAAACATATTG
M17645212	17645212	39614	T	G	ACAATGACGGTGACGACAGT	CTCAGGGTTCATCAGGTGGTAT
M17668950	17668950	63352	G	A	AGTAGGCAGCCACTGAAGG	AACAACAGCAGGAACCATCG
M17682505	17682505	76907	G	A	TGCCACAACAATACAACATTCG	ATCCACCGCCAACAGGAA
aCausal gene (GS3) locat at 17599988-17605598 bp.

## Sheet: qGW5-2
qGW5-2
Marker	Genomic position (bp)	Distance to causal gene (bp)a	MH63 allele	ZS97 alele	5' primer sequence	3' primer sequence
M5258626	5258626	169907	G	T	GGTTAATACGCACGGCAAGAA	TGACCAGAGGTGTAGCGATTC
M5327378	5327378	101155	T	C	GTCCGTGGTGGTCAGAGAT	AAGCGATACTGGGAAGCCTTA
M5419642	5419642	8891	G	A	CGGGATATAAGTAATAGATAGAGG	ACGTTGCTCTCATAGATCAGAT
M5426811	5426811	1722	A	C	TTCTTCTTGCTTGTGCGATCC	TGGATGATGATGACCTCAATGC
M5431559	5431559	1447	G	A	TCCTATATCTGCCTCTAAGTC	GGCTATTGGTTCTTGCTAG
M5440570	5440570	10458	T	G	TAACCTAGCAGATTAGTCCTTC	AAACAAGTCACCCAAATCCA
M5454996	5454996	24884	G	T	GCTTATTCCACTGATATGC	TATTCTCATCTACTCCCATC
M5469204	5469204	39092	C	A	CCGAGCGTCAAGTAGTGGT	GAGTTCAAGGTGGGCGACA
M5491605	5491605	61493	T	C	GGCTAGGAAATAGTGAGGATGG	GCAACGGTGGCTAGATGAA
M5515900	5515900	85788	C	A	AAGCACGAGAGGAAACAAACC	ATCTTACGTCGGCGGTTGT
M5536811	5536811	106699	C	A	ATCTCACCGCCTCATTCTCTT	TTGGATGCAGCTTACAATCAGT
aCausal gene (GW5) locat at 5428533-5430112 bp.

## Sheet: qGL3-3
qGL3-3
Marker	Genomic position (bp)	MH63 allele	ZS97 alele	5' primer sequence	3' primer sequence
M31462501	31462501	C	T	TATGTGGATGATGAGATGC	ACGACTTATGGAATATACCG
M31486968	31486968	G	T	ATCTGCTACTACTCGTTATCTG	CTGCGACGTTGTCTTGAT
M31509658	31509658	G	A	GCTGAGTGAGGAACTACAA	AAATGCCGTGCTGGATAT
M31529399	31529399	G	A	ACATCGAACATGGCATTTG	CGTATTGACGGCTCACAA
M31586356	31586356	A	G	TGCCGCCACAAGTACATT	TCATCACAACGCATCAAGAA
M31609602	31609602	G	C	ATCTAAACGGGTGCTTCG	GGCTAATGAGTTATCCTATTGG
M31627357	31627357	T	C	GAAGAAGCCAAGCCAGAG	TGCTGGTGTCCTGCTTAT
M31644969	31644969	T	G	ACAAGTCTTCAGATAGGATG	TAGGTTGGTGTTGCGATA
M31664310	31664310	A	G	AGAAGAGTTCAGGAGTTGTT	TTCGGTGGATTGTTGGTT
M31684896	31684896	G	T	ATGATGGTCAAGTTGTCACA	TGGTAGGGTAGAGTTGGTAG
